# Supplementary material
Source: PubMed Central journal article supplement (PMC2897912)

**Supplementary Figure S1. IL-17RC associates with a specific IL-17RA isoform in a ligand-dependent manner and in a manner independent of the IL-17RC cytoplasmic tail.**

HEK293T cells were transiently co-transfected with IL-17RA together with the various IL-17RC deletion mutants. Cells were treated without cytokines or with 200 ng/ml IL-17A or 200 ng/ml IL-17F 20 minutes, and lysates were immunoprecipitated with anti-Myc Abs.

Immunoprecipitates and whole cell lysates were immunoblotted with Abs to IL-17RA.

**Supplementary Figure S2. Histological evidence that IL-17RC<sup>-/-</sup> mice are susceptible to oropharyngeal candidiasis.** Sections of tongue tissue from wild-type (WT) cortisone treated, IL-17RC<sup>-/-</sup> sham infected, IL-17RC<sup>-/-</sup> and IL-17RC<sup>+/-</sup> *Candida*-infected mice were stained with PAS to detect fungi.

Supplemental Figure S1 (Ho et al.)

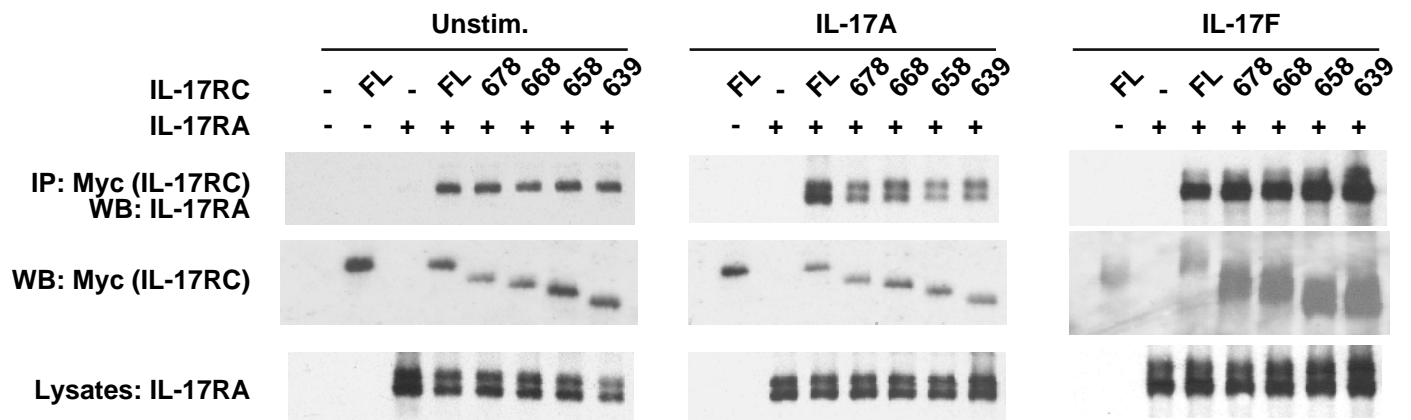

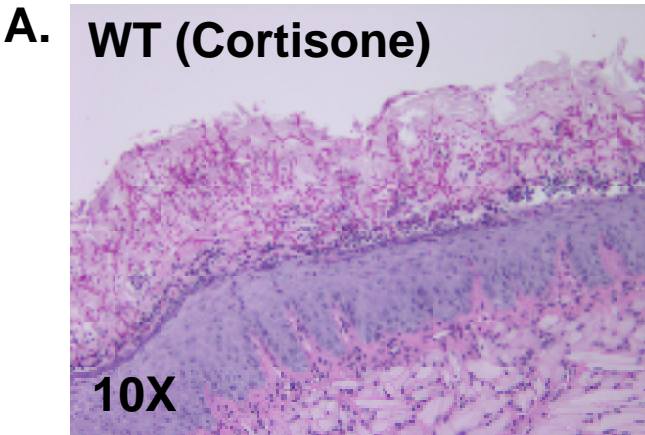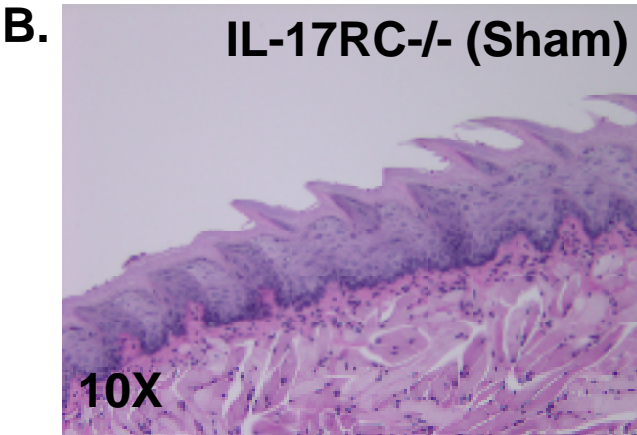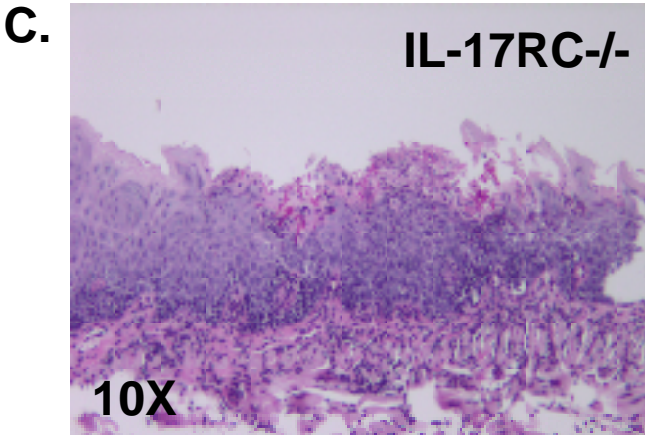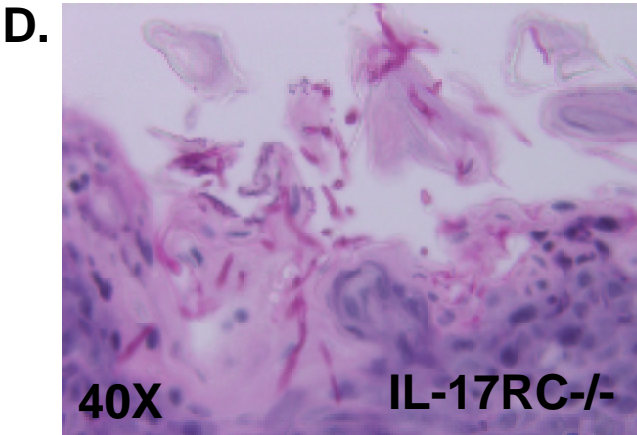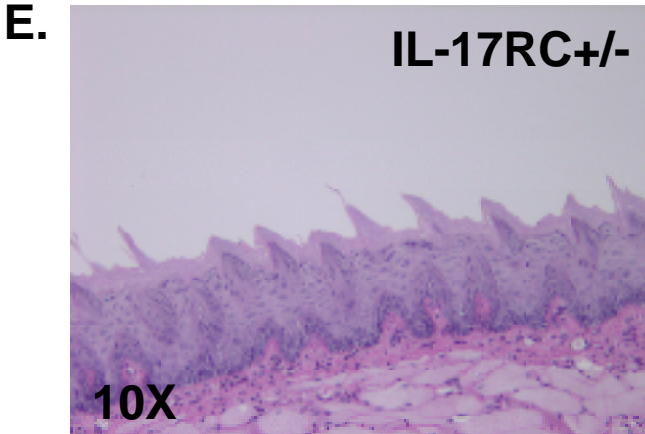

Supplement: NIHMS206875-supplement-01.pdf [file NIHMS206875-supplement-01.pdf]
